# Supplementary material for: Methane dry reforming in a coking- and sintering-free liquid alloy-salt catalytic system
Source: Royal Society of Chemistry journal article supplement (doi:10.1039/d0se00433b), 2020-01-01
Supplement: d0se00433b1.pdf [file d0se00433b1.pdf]

## Electronic Supplementary Information

### **Methane Dry Reforming in a Coking- and Sintering-Free Liquid Alloy-Salt Catalytic System**

Qinghai Yang,<sup>‡a</sup> Congquan Zhou,<sup>‡a</sup> Jihong Ni,<sup>a</sup> and Xiaofei Guan<sup>\*a</sup>

<sup>a</sup> School of Physical Science and Technology, ShanghaiTech University,  
Shanghai, 201210, China.

<sup>‡</sup>These authors contribute equally.

<sup>\*</sup>E-mail: guanxf@shanghaitech.edu.cn

#### **Table of Contents:**

- Table S1
- Fig. S1-S7
- References for the Electronic Supplementary Information

**Table S1** A list of potential reactions taking place in the liquid NiBi-K<sub>2</sub>CO<sub>3</sub> catalytic system during the dry reforming of CH<sub>4</sub> with CO<sub>2</sub>.

| No. | Type of reactions                                                       | Chemical equations                                                                                                                   |
|-----|-------------------------------------------------------------------------|--------------------------------------------------------------------------------------------------------------------------------------|
| 1   | CH <sub>4</sub> dry reforming                                           | $\text{CH}_{4(g)} + \text{CO}_{2(g)} \rightarrow 2\text{H}_{2(g)} + 2\text{CO}_{(g)}$                                                |
| 2   | CH <sub>4</sub> pyrolysis                                               | $\text{CH}_{4(g)} \rightarrow \text{C}_{(s)} + 2\text{H}_{2(g)}$                                                                     |
| 3   | Reverse Boudouard                                                       | $\text{C}_{(s)} + \text{CO}_{2(g)} \rightarrow 2\text{CO}_{(g)}$                                                                     |
| 4   | Reverse water gas shift                                                 | $\text{H}_{2(g)} + \text{CO}_{2(g)} \rightarrow \text{H}_2\text{O}_{(g)} + \text{CO}_{(g)}$                                          |
| 5   | Steam gasification of carbon                                            | $\text{C}_{(s)} + \text{H}_2\text{O}_{(g)} \rightarrow \text{H}_{2(g)} + \text{CO}_{(g)}$                                            |
| 6   | CH <sub>4</sub> steam reforming                                         | $\text{CH}_{4(g)} + \text{H}_2\text{O}_{(g)} \rightarrow 3\text{H}_{2(g)} + \text{CO}_{(g)}$                                         |
| 7   | C oxidation via K <sub>2</sub> CO <sub>3(l)</sub>                       | $1/2\text{K}_2\text{CO}_{3(l)} + \text{C}_{(s)} \rightarrow \text{K}_{(g)} + 3/2\text{CO}_{(g)}$                                     |
| 8   | CO <sub>2</sub> reduction via K <sub>(g)</sub>                          | $\text{K}_{(g)} + \text{CO}_{2(g)} \rightarrow 1/2\text{K}_2\text{CO}_{3(l)} + 1/2\text{CO}_{(g)}$                                   |
| 9   | CH <sub>4</sub> partial oxidation via K <sub>2</sub> CO <sub>3(l)</sub> | $1/2\text{CH}_{4(g)} + 1/4\text{K}_2\text{CO}_{3(l)} \rightarrow \text{H}_{2(g)} + 3/4\text{CO}_{(g)} + 1/2\text{K}_{(g)}$           |
| 10  | CH <sub>4</sub> oxidation via K <sub>2</sub> CO <sub>3(l)</sub>         | $1/8\text{CH}_{4(g)} + 1/2\text{K}_2\text{CO}_{3(l)} \rightarrow 1/8\text{H}_2\text{O}_{(g)} + 5/8\text{CO}_{2(g)} + \text{K}_{(g)}$ |
| 11  | K <sub>2</sub> CO <sub>3(l)</sub> decomposition                         | $\text{K}_2\text{CO}_{3(l)} \rightarrow \text{K}_2\text{O}_{(l)} + \text{CO}_{2(g)}$                                                 |
| 12  | H <sub>2</sub> oxidation via K <sub>2</sub> CO <sub>3(l)</sub>          | $1/2\text{K}_2\text{CO}_{3(l)} + 1/2\text{H}_{2(g)} \rightarrow \text{K}_{(g)} + \text{H}_2\text{O}_{(g)} + 1/2\text{CO}_{(g)}$      |
| 13  | Steam partial reduction via K <sub>(g)</sub>                            | $\text{K}_{(g)} + \text{H}_2\text{O}_{(g)} \rightarrow \text{KOH}_{(l)} + 1/2\text{H}_{2(g)}$                                        |
| 14  | CO oxidation via KOH <sub>(l)</sub>                                     | $2\text{KOH}_{(l)} + \text{CO}_{(g)} \rightarrow \text{K}_2\text{CO}_{3(l)} + \text{H}_{2(g)}$                                       |
| 15  | Absorption of CO <sub>2</sub> via KOH <sub>(l)</sub>                    | $2\text{KOH}_{(l)} + \text{CO}_{2(g)} \rightarrow \text{K}_2\text{CO}_{3(l)} + \text{H}_2\text{O}_{(g)}$                             |
| 16  | CH <sub>4</sub> oxidation via H <sub>2</sub> O and KOH <sub>(l)</sub>   | $\text{CH}_{4(g)} + \text{H}_2\text{O}_{(g)} + 2\text{KOH}_{(l)} \rightarrow \text{K}_2\text{CO}_{3(l)} + 4\text{H}_{2(g)}$          |

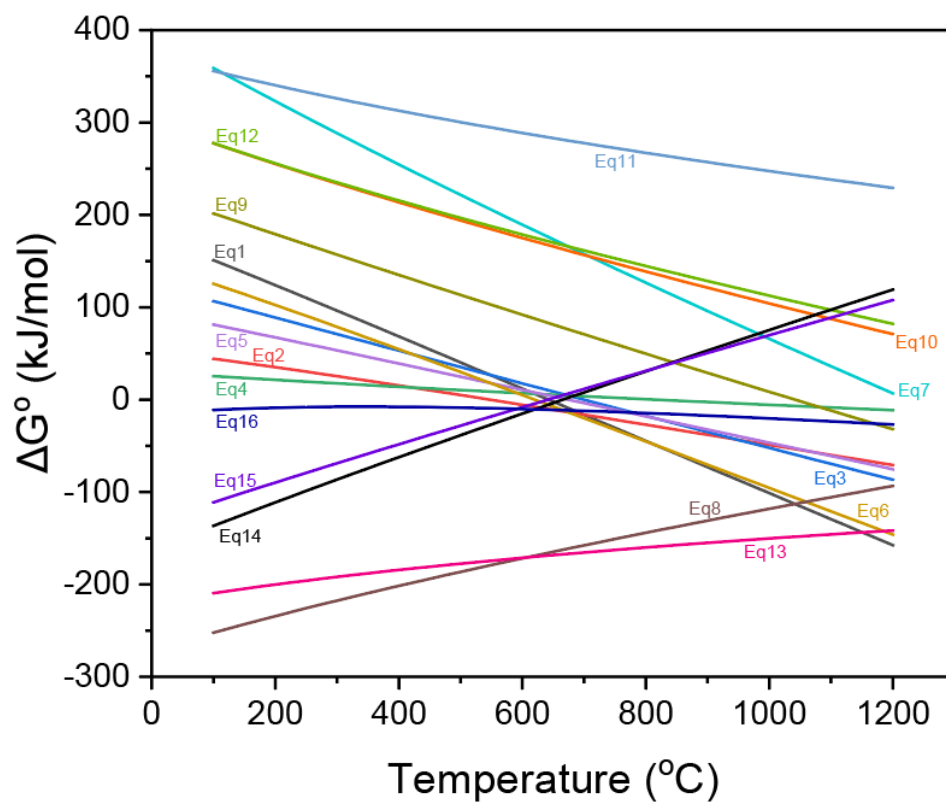

**Fig. S1** Standard Gibbs free energy change,  $\Delta G^\circ$ , (kJ/mol) for the reactions in Table S1. The values of  $\Delta G^\circ$  are obtained from HSC Chemistry Database.<sup>1</sup>

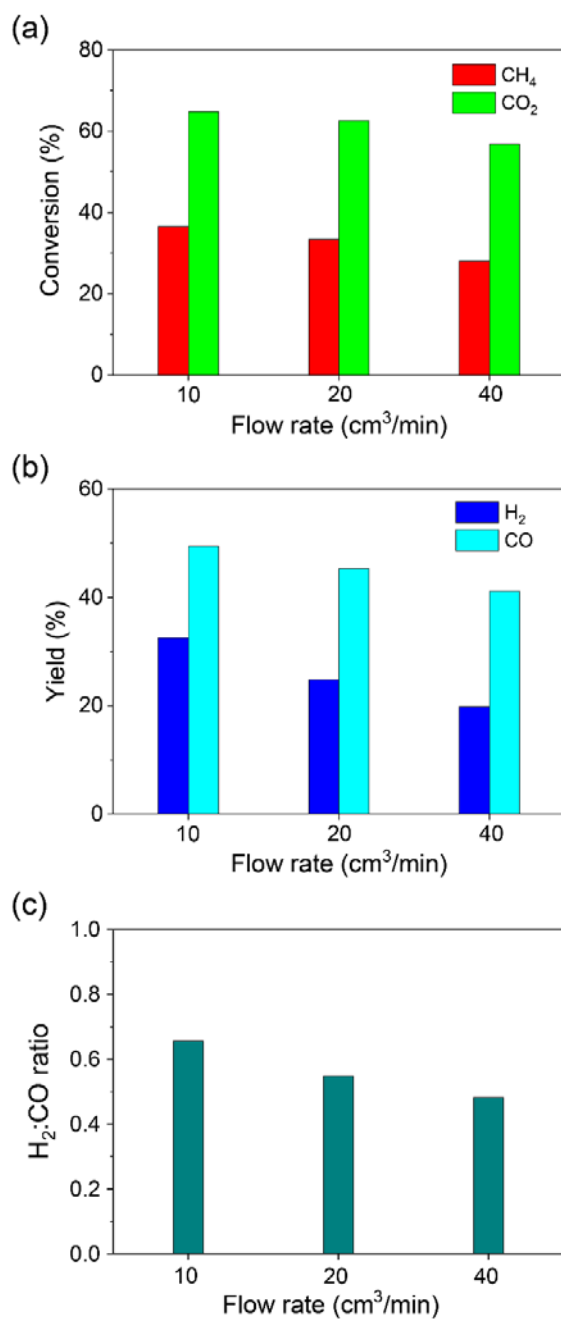

**Fig. S2** Effect of the inlet gas flow rate on the catalytic performances of dry reforming with the Ni<sub>0.27</sub>Bi<sub>0.73</sub>(15cm)-K<sub>2</sub>CO<sub>3</sub>(15cm) catalytic system at 1000 °C. (a) The conversions of CH<sub>4</sub> and CO<sub>2</sub>, (b) the yields of H<sub>2</sub> and CO and (c) the H<sub>2</sub>:CO ratio as functions of the flow rate of the equimolar mixture of CH<sub>4</sub> and CO<sub>2</sub>.

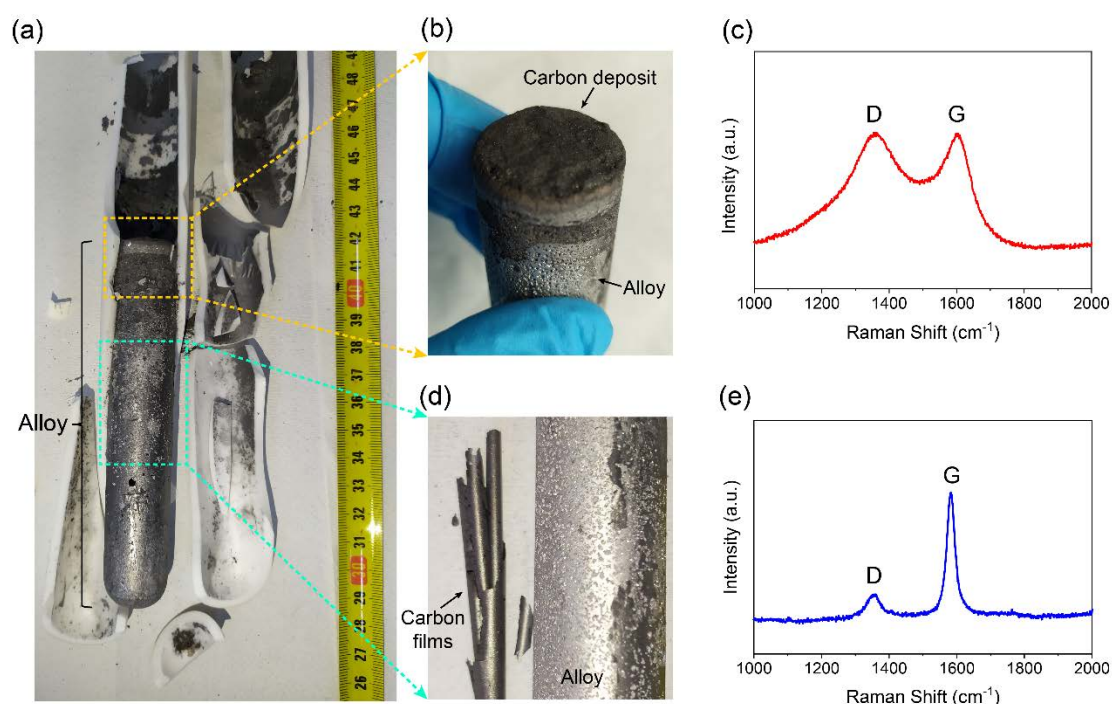

**Fig. S3** Carbon production in the dry reforming experiment with 15 cm of  $\text{Ni}_{0.27}\text{Bi}_{0.73}$  alloy as catalyst at 1000 °C for 24 hours with an equimolar mixture of  $\text{CH}_4$  and  $\text{CO}_2$  at 10 cm<sup>3</sup>/min. (a) Photograph of the cooled alloy after opening the alumina reactor. (b) Photograph of the top surface of the cooled alloy. (c) Representative Raman spectrum of the deposit collected from the top of the alloy shows the characteristic peaks at ~1360 and ~1580 cm<sup>-1</sup> for D and G bands of graphite, respectively. The relative intensity ratio of D and G bands is approximately 1. (d) Photograph of the middle part of the alloy column. Carbon films formed on the interface between the alloy and the alumina reactor via precipitation from the saturated alloy, and some of them readily peeled off. (e) Representative Raman spectrum of the films shows the characteristic peaks for graphite. The relative intensity ratio of D and G bands of the carbon film is much smaller than that of the carbon deposit on the top of alloy, indicating a higher degree of graphitization.<sup>2-3</sup>

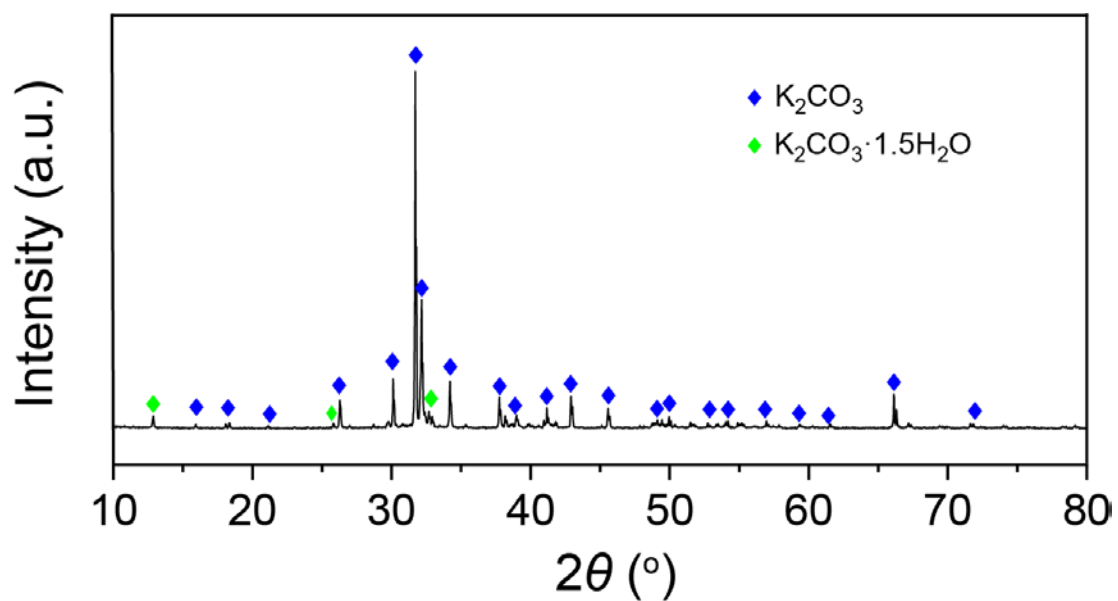

**Fig. S4** Representative XRD pattern of the salt samples from the 120-h stability test showing that  $\text{K}_2\text{CO}_3$  (PDF #01-087-0730) was the main phase with traces of  $\text{K}_2\text{CO}_3 \cdot 1.5\text{H}_2\text{O}$  (PDF #00-011-0655).

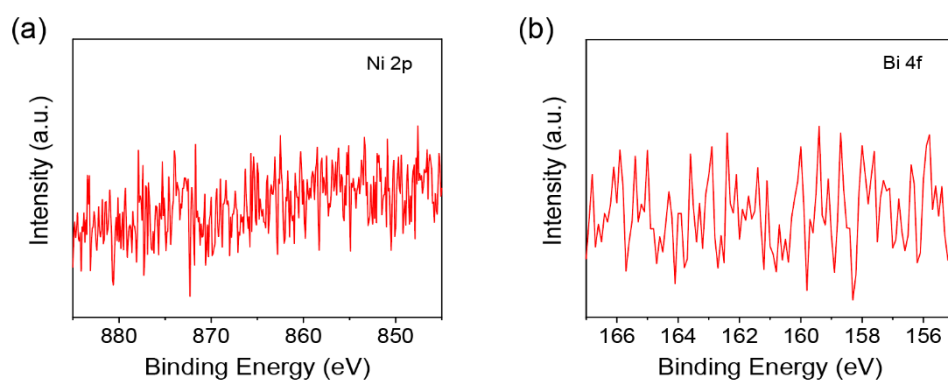

**Fig. S5** Representative Ni 2p and Bi 4f XPS spectra of the solidified salt samples.

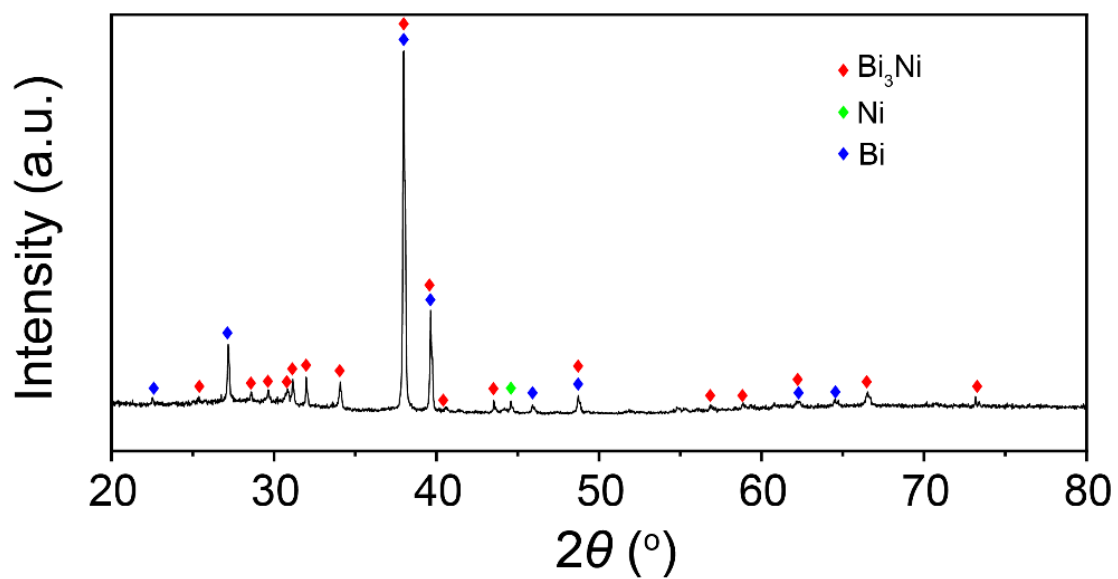

**Fig. S6** Representative XRD pattern of the alloy samples after the 120-h stability test showing the characteristic peaks for the crystalline phases of Bi (PDF #00-005-0519), Bi<sub>3</sub>Ni (PDF #00-054-0537) and Ni (PDF #04-010-6148).

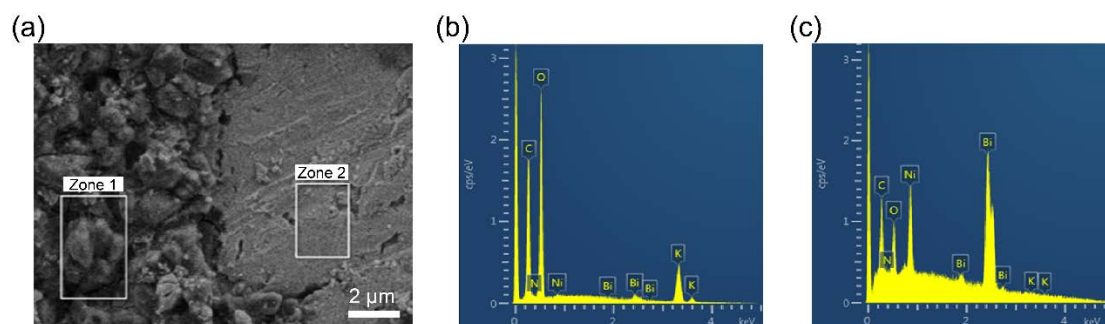

**Fig. S7** SEM and EDS results showing that  $K_2CO_3$  was identified in the alloy sample after the dry reforming experiment. (a) SEM image of a solidified alloy sample collected near the middle of the alloy column. (b) EDS analysis for zone 1 showing the presence of  $K_2CO_3$ . (c) EDS analysis for zone 2 showing the alloy phase.

#### References for the Electronic Supplementary Information:

1. Roine, A., HSC Chemistry Database 5.11, Outokumpu Research, Helsinki, Finland, 2002.
2. Ferrari, A.; Robertson, J.; Reich, S.; Thomsen, C., Raman spectroscopy of graphite. *Philos. T. Roy. Soc. A.* 2004, 362 (1824), 2271-2288.
3. Tallant, D. R.; Friedmann, T. A.; Missert, N. A.; Siegal, M. P.; Sullivan, J. P., Raman Spectroscopy of Amorphous Carbon. *Mat. Res. Soc. Symp. Proc.* 1997, 498, 37.
